# Supplementary material for: Fast Differential Analysis of Propolis Using Surface Desorption Atmospheric Pressure Chemical Ionization Mass Spectrometry
Source: Hindawi journal article supplement (doi:10.1155/2015/176475), 2015-01-01

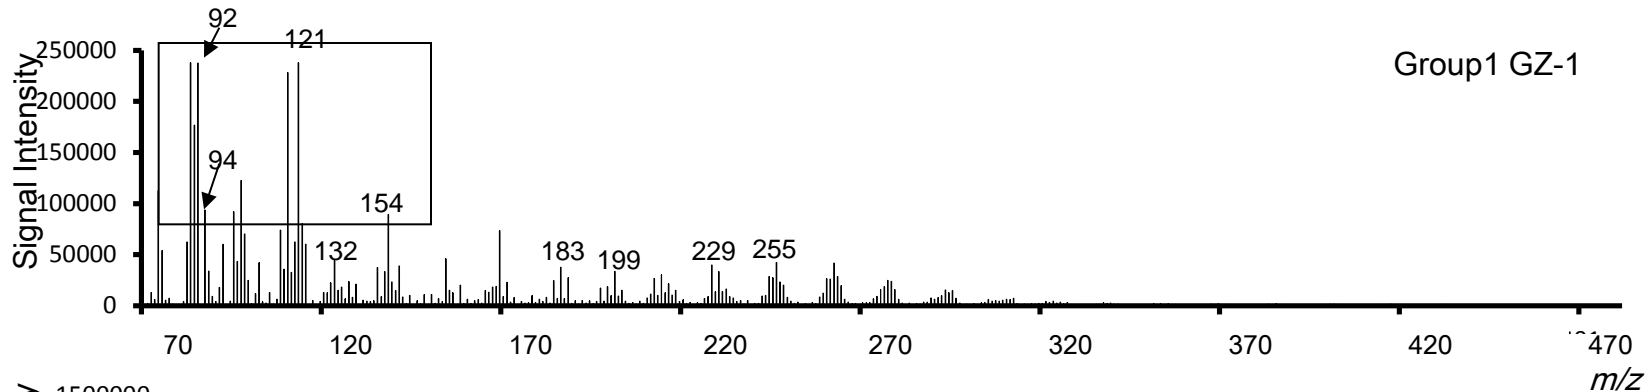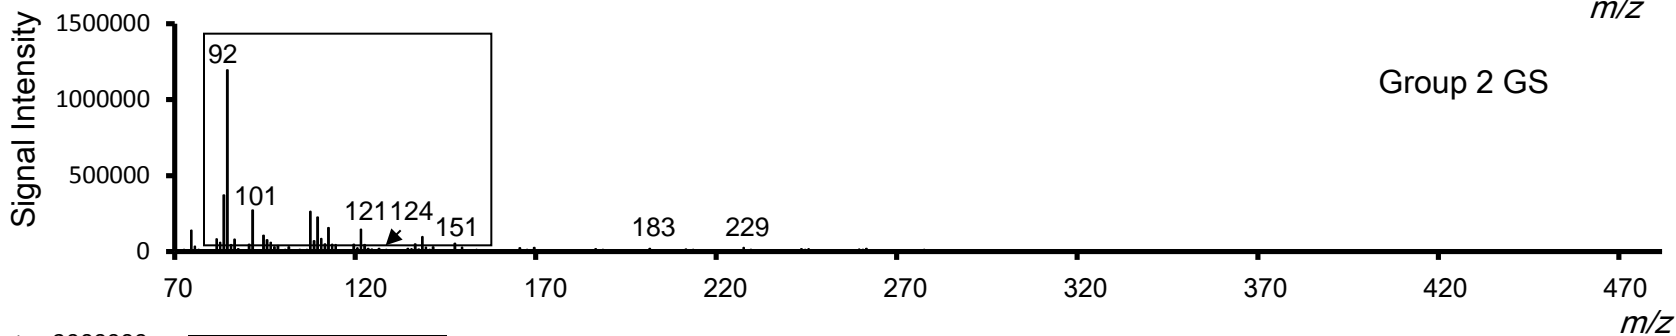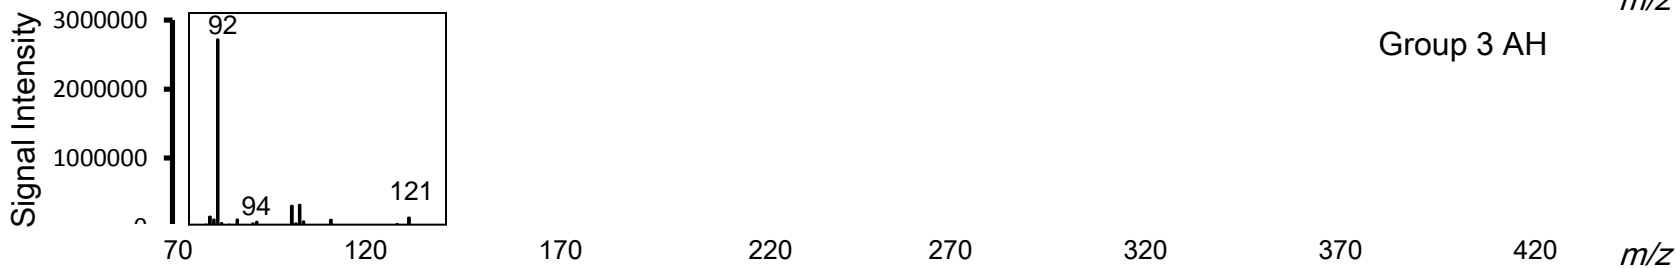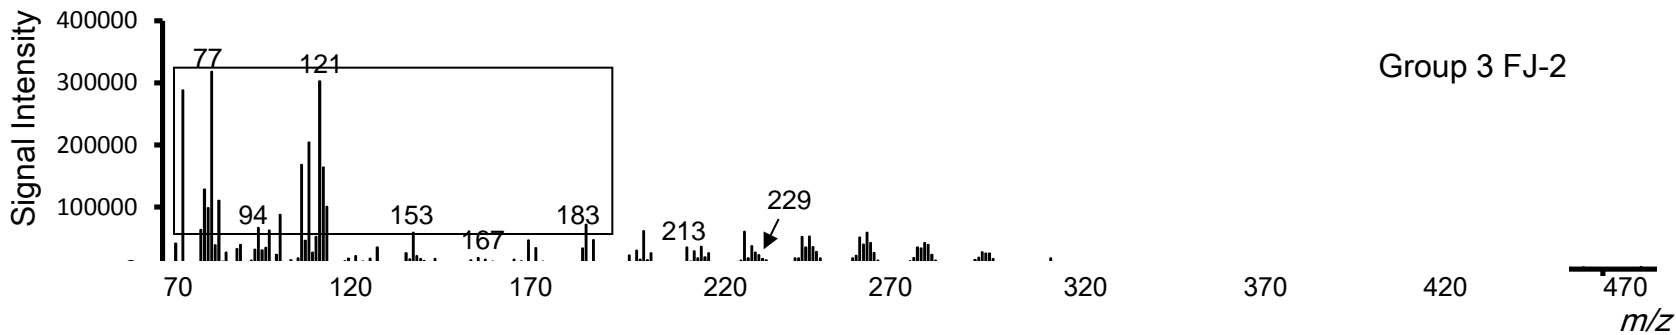

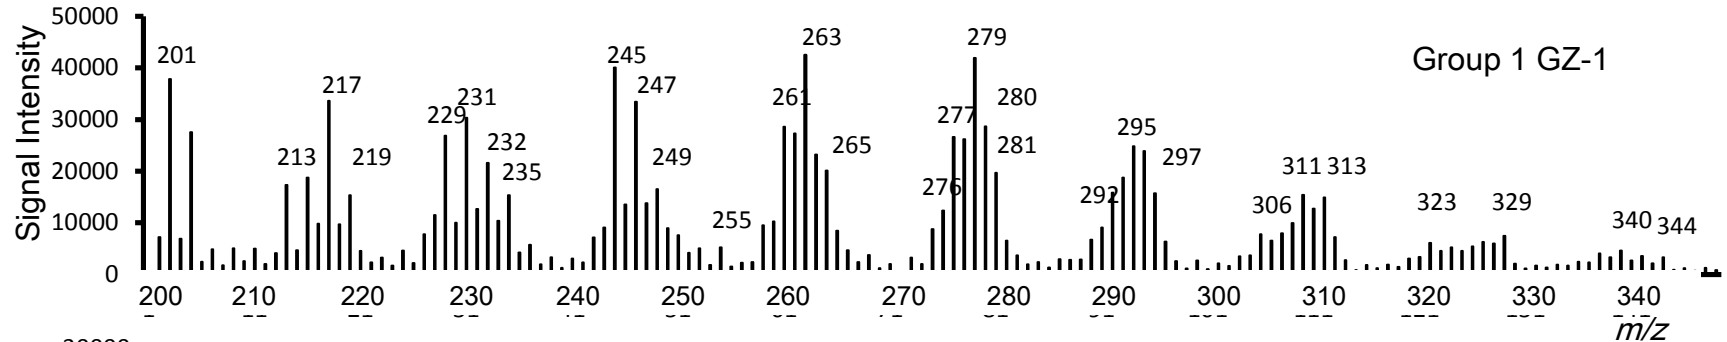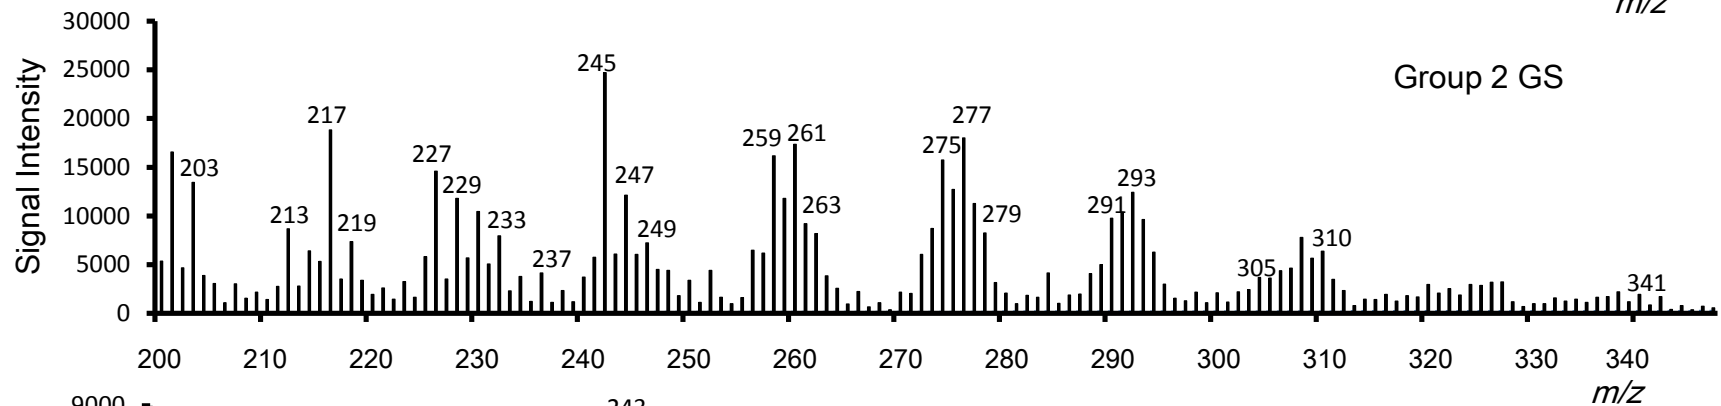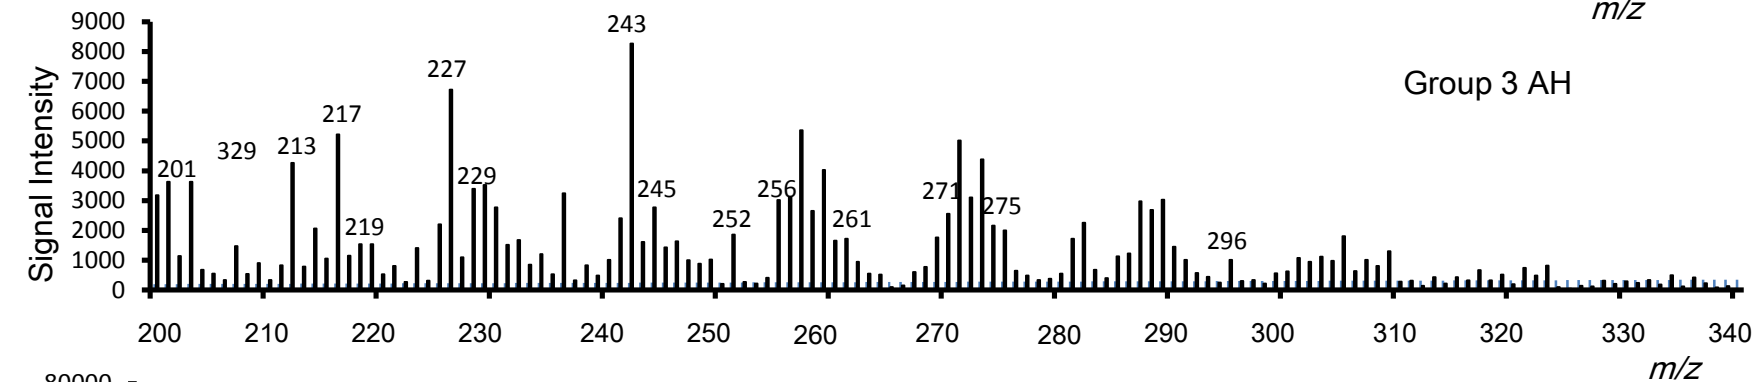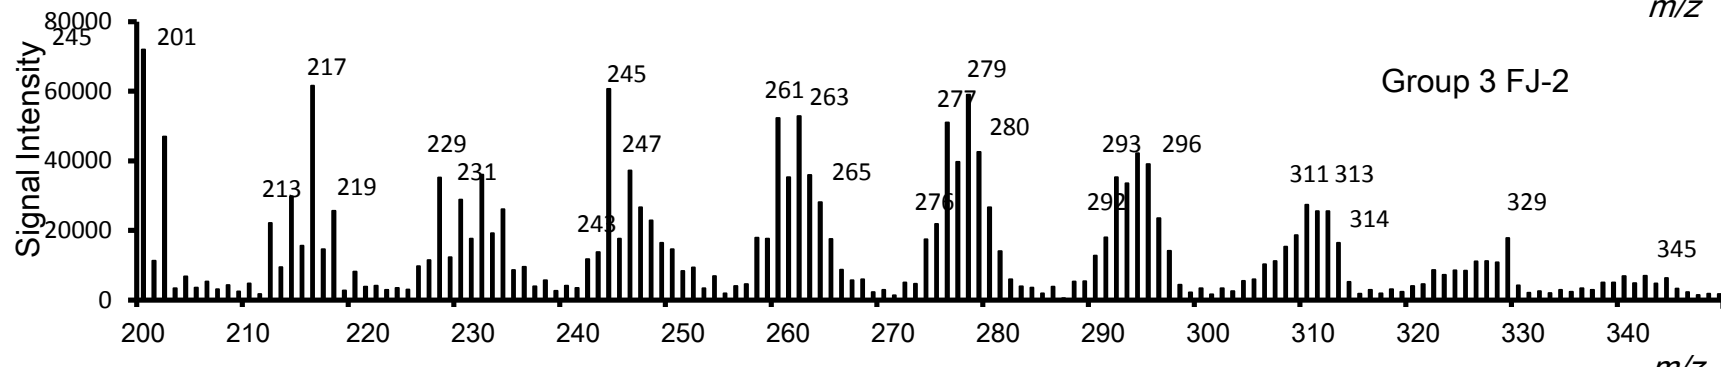

Supplement: f1 [file 176475.f1.pdf]
